# Supplementary material
Source: Springer Nature journal article supplement (https://www.springermedizin.de/resource/supplementary/12936_2012_2448_MOESM1_ESM.pdf/9542700)
Supplement: MOESM1 [file 9542700]

|              | 1343 | 1427 | 1447 | 1454 | 1466 | 1476 | 1482 | 1486 | 1490 | 1491 | 1493 | 1494 | 1495 | 1496 | 1501 | 1504 | 1505 | 1506 | 1507 | 1508 | 1509 | 1510 | 1511 | 1513 | 1514 | 1515 | 1516 | 1517 | 1518 | 1519 | 1520 | 1521 | 1522 | 1524 | 1525 | 1526 | 1527 | 1603 | 1613 | 1692 |       |
|--------------|------|------|------|------|------|------|------|------|------|------|------|------|------|------|------|------|------|------|------|------|------|------|------|------|------|------|------|------|------|------|------|------|------|------|------|------|------|------|------|------|-------|
| Sal I        | N    | N    | L    | I    | M    | T    | G    | K    | D    | G    | K    | T    | E    | I    | D    | K    | K    | Q    | D    | E    | E    | L    | K    | L    | G    | N    | V    | N    | S    | Q    | D    | S    | K    | N    | E    | F    | I    | E    | L    | N    | Total |
| Belem        | N    | N    | L    | L    | K    | T    | G    | K    | T    | A    | N    | E    | E    | V    | A    | K    | A    | E    | D    | D    | K    | I    | K    | I    | G    | S    | D    | S    | T    | K    | T    | T    | E    | T    | Q    | S    | M    | E    | L    | N    |       |
| Haplotype 1  | N    | N    | L    | L    | K    | A    | E    | K    | T    | A    | N    | E    | E    | V    | A    | K    | A    | E    | D    | D    | K    | I    | K    | I    | G    | S    | D    | S    | T    | K    | T    | T    | E    | T    | Q    | S    | M    | E    | L    | N    | 6     |
| Haplotype 2  | N    | N    | L    | L    | K    | A    | E    | K    | T    | A    | N    | E    | E    | V    | A    | K    | A    | E    | D    | D    | K    | I    | K    | I    | G    | S    | D    | S    | T    | K    | T    | T    | E    | T    | Q    | S    | M    | E    | V    | N    | 1     |
| Haplotype 3  | N    | N    | L    | L    | K    | A    | E    | K    | T    | A    | N    | E    | E    | V    | A    | K    | A    | E    | D    | D    | K    | I    | K    | I    | G    | S    | D    | S    | T    | K    | T    | T    | E    | T    | Q    | S    | M    | V    | L    | N    | 23    |
| Haplotype 4  | N    | N    | L    | L    | K    | A    | E    | K    | T    | A    | N    | E    | E    | V    | A    | K    | A    | E    | D    | D    | K    | I    | K    | I    | G    | S    | D    | S    | T    | K    | T    | T    | E    | T    | Q    | S    | M    | E    | L    | N    | 3     |
| Haplotype 5  | N    | N    | W    | L    | K    | A    | E    | K    | T    | A    | N    | E    | E    | V    | A    | K    | A    | E    | D    | D    | K    | I    | K    | I    | G    | S    | D    | S    | T    | K    | T    | T    | E    | T    | Q    | S    | M    | E    | L    | K    | 24    |
| Haplotype 6  | N    | N    | L    | I    | M    | A    | E    | K    | T    | A    | N    | E    | E    | V    | A    | K    | A    | E    | D    | D    | K    | I    | K    | I    | E    | N    | E    | A    | N    | K    | A    | A    | E    | T    | Q    | S    | M    | E    | L    | N    | 19    |
| Haplotype 7  | N    | Y    | L    | I    | M    | A    | E    | K    | T    | A    | N    | E    | E    | A    | A    | K    | A    | E    | D    | D    | K    | I    | K    | I    | E    | N    | E    | A    | N    | K    | A    | A    | E    | T    | Q    | S    | M    | E    | L    | N    | 10    |
| Haplotype 8  | N    | N    | L    | I    | K    | A    | G    | R    | D    | G    | N    | E    | E    | V    | A    | K    | A    | E    | D    | D    | K    | I    | K    | I    | E    | N    | E    | A    | N    | K    | A    | A    | E    | T    | Q    | S    | M    | E    | L    | N    | 4     |
| Haplotype 9  | N    | N    | L    | L    | K    | A    | E    | K    | T    | A    | N    | A    | Q    | I    | D    | N    | T    | Q    | N    | E    | E    | L    | K    | I    | E    | N    | E    | A    | N    | K    | T    | A    | E    | A    | K    | F    | T    | E    | L    | N    | 15    |
| Haplotype 10 | Y    | N    | L    | L    | K    | A    | E    | K    | T    | A    | N    | A    | Q    | I    | D    | N    | T    | Q    | N    | E    | E    | L    | K    | I    | E    | N    | E    | A    | N    | K    | T    | A    | E    | A    | K    | F    | T    | E    | L    | N    | 14    |
| Haplotype 11 | N    | N    | L    | L    | K    | A    | G    | K    | D    | G    | K    | T    | E    | I    | D    | K    | T    | H    | D    | E    | K    | L    | Q    | L    | G    | S    | E    | V    | S    | Q    | N    | S    | E    | T    | Q    | L    | N    | E    | L    | N    | 30    |
